# Supplementary material for: Controllable growth on nano-graphite-supported ZrO2–MnOx bimetallic oxides for electrocatalytic antibiotic degradation: mechanism to boost the Mn3+/Mn4+ redox cycle
Source: Royal Society of Chemistry journal article supplement (doi:10.1039/d3nj03247g), 2023-01-01
Supplement: d3nj03247g1.pdf [file d3nj03247g1.pdf]

# Controllable growth on Nano-graphite-supported $\text{ZrO}_2\text{-MnO}_x$ bimetallic oxides for electrocatalytic antibiotics degradation: Boosting mechanism of $\text{Mn}^{3+}/\text{Mn}^{4+}$ redox cycle

Si Duan<sup>a</sup>, Guihong Lan<sup>a,\*</sup>, Xiaoting Yang<sup>b</sup>, Yongqiang Liu<sup>c</sup>, Haiyan Qiu<sup>a</sup>, Bo Xu<sup>a</sup>, Yuan Gao<sup>a</sup>,  
Zhuang Xie<sup>a</sup>

<sup>a</sup> Southwest Petr Univ, Sch Chem & Chem Engr, Chengdu 610500, Sichuan, PR China.

<sup>b</sup> Eternal Chemical (Chengdu) Co., Ltd., Qionglai 611534, Sichuan, China.

<sup>c</sup> Faculty of Engineering and Physical Sciences, University of Southampton, Southampton SO17 1  
BJ, UK.

\* Corresponding author at: Southwest Petr Univ, Sch Chem & Chem Engr, Chengdu 610500,  
Sichuan, PR China.

E-mail addresses: [guihonglan416@sina.com](mailto:guihonglan416@sina.com) (Guihong Lan).

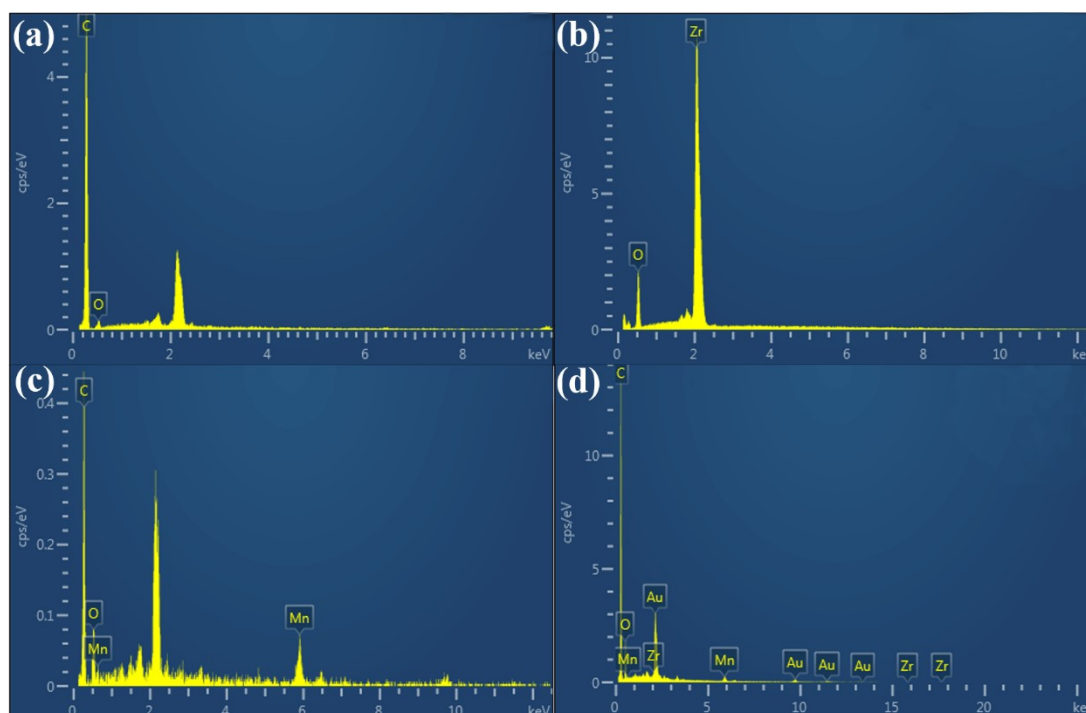

Fig. S1 EDS of (a) Nano-G, (b) ZrO<sub>2</sub>, (c) MnO<sub>x</sub>/Nano-G and (d) ZrO<sub>2</sub>-MnO<sub>x</sub>/Nano-G composites.

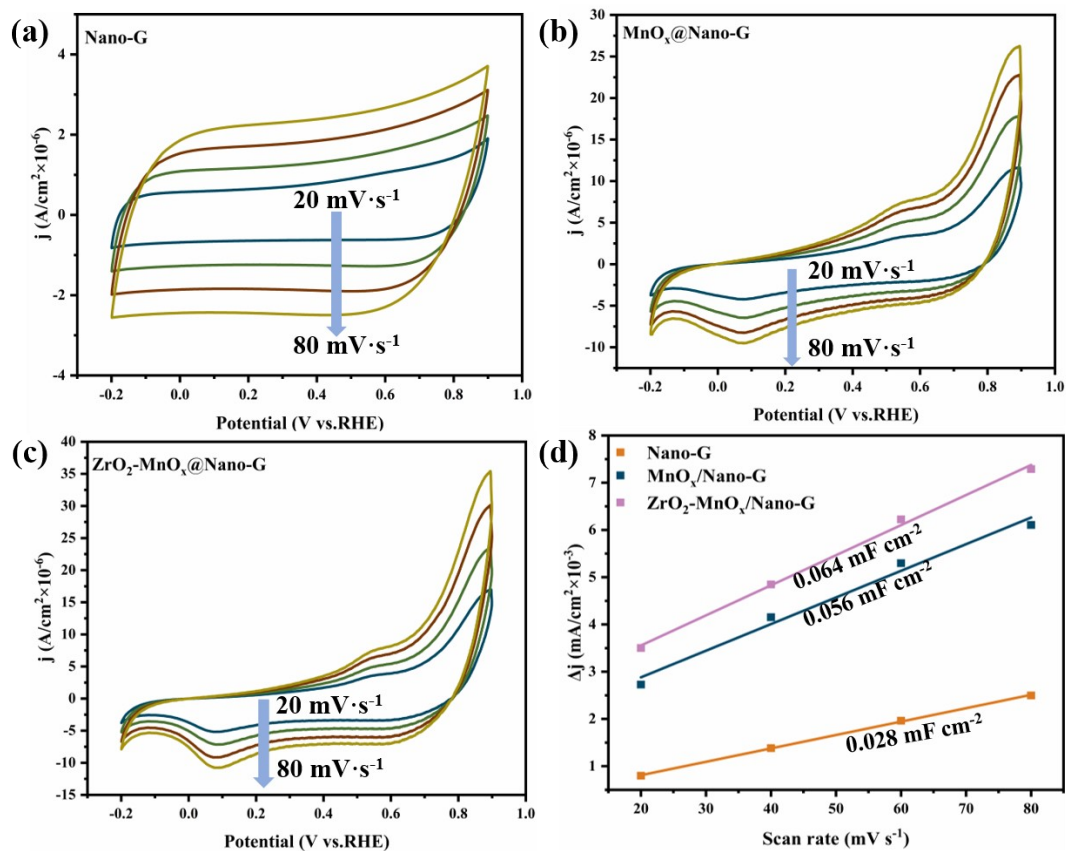

Fig. S2 (a-c) The CV curves of the samples were measured at different scanning speeds and (d) the  $C_{dl}$  was evaluated by the changing diagram of the relationship between  $\Delta j$  and scanning speed.

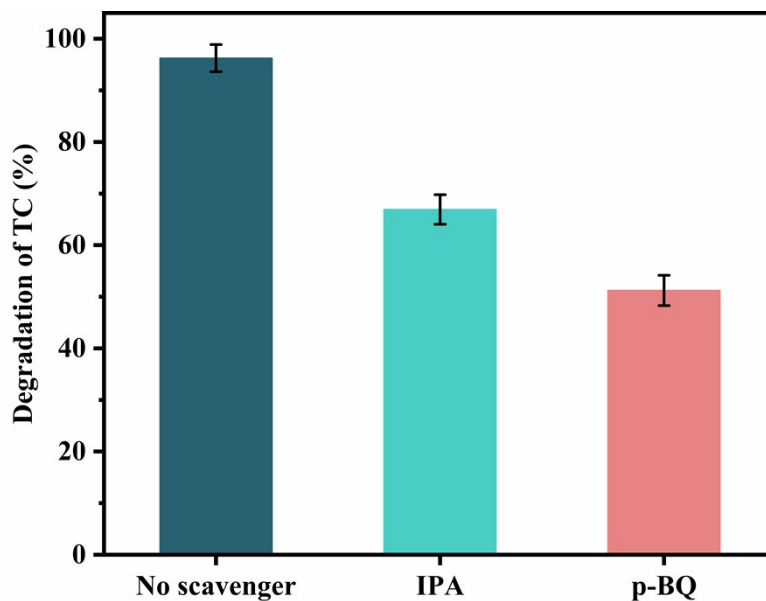

Fig. S3 Quenching study on ZrO<sub>2</sub>-MnO<sub>x</sub>/Nano-G electrode for TC degradation. Conditions: TC (20

mg L<sup>-1</sup>), current density 30 mA cm<sup>-2</sup>, IPA 10 mmol L<sup>-1</sup>, P-BQ 0.1 mmol L<sup>-1</sup>.

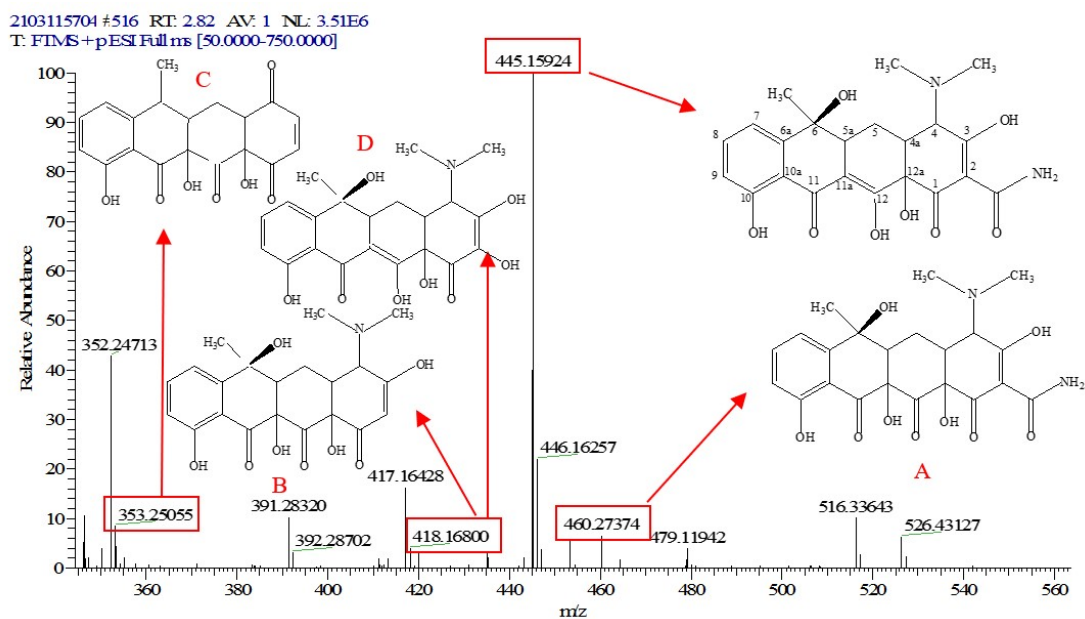

**Fig. S4** Mass spectra of TC and intermediates at 2.82 min retention time.

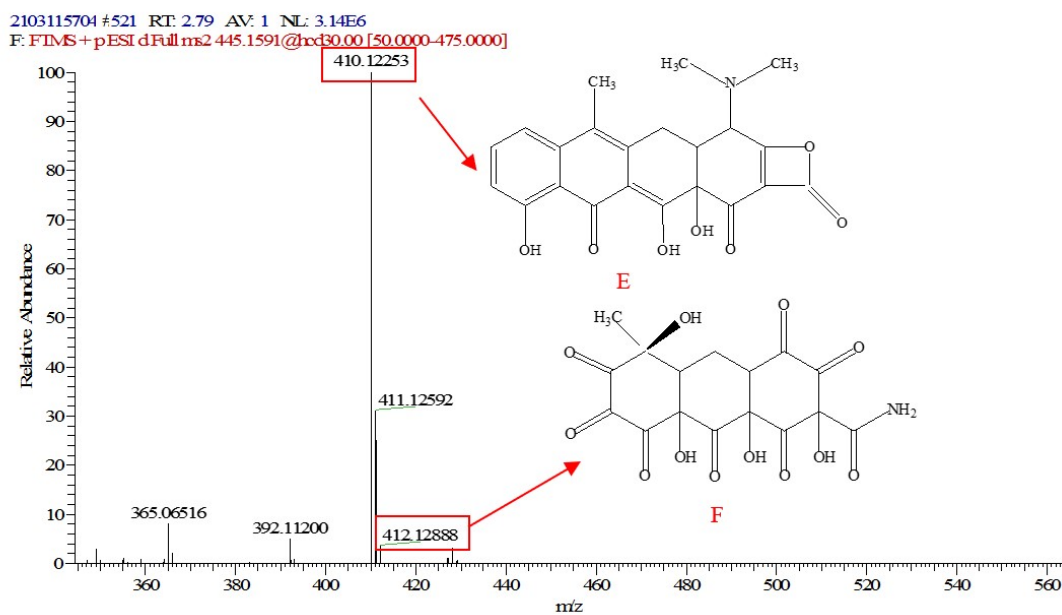

**Fig. S5** Mass spectra of TC and intermediates at 2.79 min retention time.

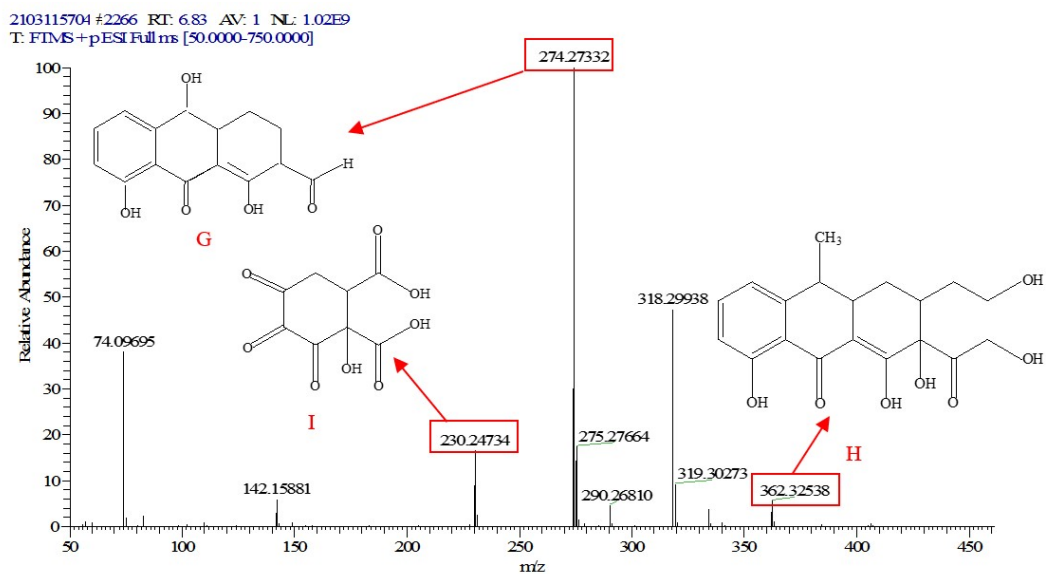

**Fig. S6** Mass spectra of TC and intermediates at 6.83 min retention time.

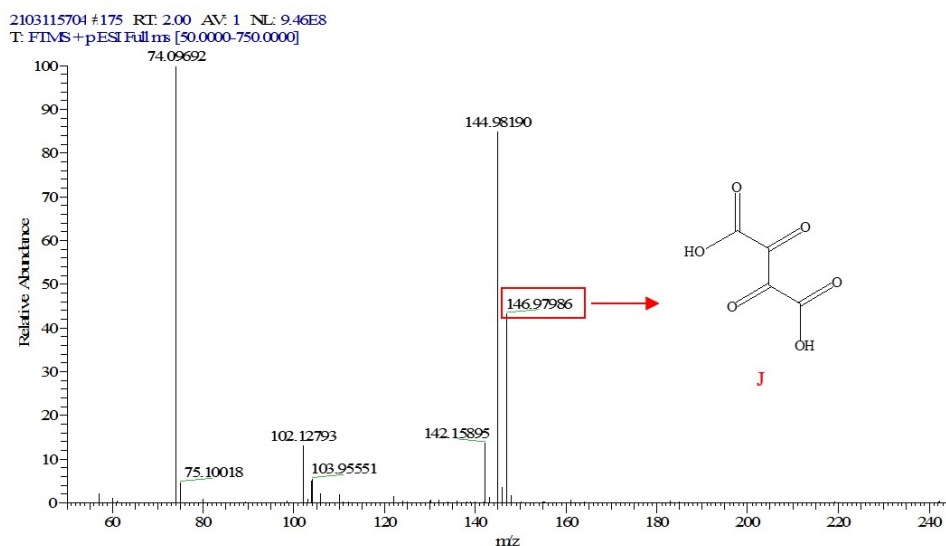

**Fig. S7** Mass spectra of TC and intermediates at 2.0 min retention time.

**Table. S1** Element percentage of MnO<sub>x</sub>/Nano-G and ZrO<sub>2</sub>-MnO<sub>x</sub>/Nano-G composites

|                                            | Element (wt%) |       |      |       |
|--------------------------------------------|---------------|-------|------|-------|
|                                            | C             | O     | Mn   | Zr    |
| Nano-G                                     | 92.22         | 7.78  | -    | -     |
| ZrO <sub>2</sub>                           | -             | 25.97 | -    | 74.03 |
| MnO <sub>x</sub> /Nano-G                   | 58.02         | 15.09 | 26.9 | -     |
| ZrO <sub>2</sub> -MnO <sub>x</sub> /Nano-G | 61.89         | 12.34 | 3.16 | 0.08  |

**Table. S2** BET surface area and pore volume of Nano-G, MnO<sub>x</sub>/Nano-G and ZrO<sub>2</sub>-MnO<sub>x</sub>/Nano-G composites

| Electrode                                  | BET surface area (m <sup>2</sup> /g) | Pore volume (cm <sup>3</sup> /g) |
|--------------------------------------------|--------------------------------------|----------------------------------|
| Nano-G                                     | 4.78                                 | 0.024                            |
| MnO <sub>x</sub> /Nano-G                   | 6.24                                 | 0.030                            |
| ZrO <sub>2</sub> -MnO <sub>x</sub> /Nano-G | 6.85                                 | 0.048                            |

**Table. S3** Reported literature about the treatment of TC

| Materials                                                       | Technologies                 | Concentration | Degradation rate   | References |
|-----------------------------------------------------------------|------------------------------|---------------|--------------------|------------|
| MnFe <sub>2</sub> O <sub>4</sub> /CNT                           | Electrocatalysis             | 40 mg/L       | 87.7% within 2h    | 1          |
| SnO <sub>2</sub> -Sb/ACFs                                       | Electrocatalysis             | 20 mg/L       | 100 % within 2 h   | 2          |
| Bi-Sn-Sb/γ-Al <sub>2</sub> O <sub>3</sub>                       | Electrocatalysis             | 100 mg/L      | 85.9% within 3 h   | 3          |
| Bi <sub>2</sub> O <sub>3</sub> film                             | Photoelectrocatalysis        | 10 mg/L       | 70.0% within 5 h   | 4          |
| Ag@Bi <sub>2</sub> WO <sub>6</sub> /FeWO <sub>4</sub> nanosheet | Peroxymonosulfate activation | 10 mg/L       | 96%within 60 min   | 5          |
| ZrO <sub>2</sub> -MnO <sub>x</sub> /Nano-G                      | Electrocatalysis             | 20 mg/L       | 93% within 120 min | This work  |

**Table. S4** Frontier electron densities on atoms and Hirshfeld charge of the TC molecule

| Atom  | Fukui (-) | Fukui (+) | Fukui (0) | CDD   | Hirshfeld charge |
|-------|-----------|-----------|-----------|-------|------------------|
| C (1) | 0.004     | 0.023     | 0.014     | 0.019 | -0.0322          |
| C (2) | 0.005     | 0.014     | 0.009     | 0.009 | -0.0676          |
| C (3) | 0.004     | 0.016     | 0.01      | 0.012 | 0.0727           |
| C (4) | 0.003     | 0.009     | 0.006     | 0.006 | -0.0435          |
| C (5) | 0.002     | 0.012     | 0.007     | 0.01  | -0.0013          |
| C (6) | 0.005     | 0.013     | 0.009     | 0.008 | -0.0633          |
| C (7) | 0.001     | 0.002     | 0.002     | 0.001 | 0.0899           |
| C (8) | 0.004     | 0.004     | 0.004     | 0     | -0.0185          |

|        |       |       |       |        |         |
|--------|-------|-------|-------|--------|---------|
| C (9)  | 0.006 | 0.02  | 0.013 | 0.014  | -0.049  |
| C (10) | 0.005 | 0.039 | 0.022 | 0.034  | 0.1013  |
| C (11) | 0.004 | 0.005 | 0.005 | 0.001  | -0.0594 |
| C (12) | 0.011 | 0.003 | 0.007 | -0.008 | -0.0217 |
| C (13) | 0.001 | 0.014 | 0.007 | 0.013  | 0.0723  |
| C (14) | 0.002 | 0.026 | 0.014 | 0.024  | 0.0828  |
| C (15) | 0.022 | 0.008 | 0.015 | -0.014 | 0.0272  |
| C (16) | 0.014 | 0.076 | 0.045 | 0.062  | 0.1153  |
| C (17) | 0.025 | 0.033 | 0.029 | 0.008  | -0.0491 |
| C (18) | 0.017 | 0.092 | 0.055 | 0.075  | 0.1182  |
| C (19) | 0.001 | 0.003 | 0.002 | 0.002  | -0.1023 |
| O (20) | 0.002 | 0.005 | 0.003 | 0.003  | -0.2331 |
| O (21) | 0.007 | 0.02  | 0.014 | 0.013  | -0.2207 |
| O (22) | 0.008 | 0.044 | 0.026 | 0.036  | -0.2526 |
| O (23) | 0.009 | 0.031 | 0.02  | 0.022  | -0.1878 |
| O (24) | 0.036 | 0.105 | 0.07  | 0.069  | -0.2334 |
| C (25) | 0.005 | 0.004 | 0.005 | -0.001 | 0.1397  |
| O (26) | 0.017 | 0.024 | 0.02  | 0.007  | -0.3666 |
| O (27) | 0.025 | 0.06  | 0.042 | 0.035  | -0.1284 |
| N (28) | 0.009 | 0.011 | 0.01  | 0.002  | -0.1184 |
| N (29) | 0.208 | 0.016 | 0.112 | -0.192 | -0.0769 |
| O (30) | 0.007 | 0.027 | 0.017 | 0.02   | -0.2062 |
| C (31) | 0.051 | 0.007 | 0.029 | -0.044 | -0.0531 |
| C (32) | 0.049 | 0.005 | 0.027 | -0.044 | -0.0726 |

---

## Reference

- 1 H. Zhang, X. Tong and H. Xiao, et al., Promoting the performance of electrooxidation-PMS system for degradation of tetracycline by introduction of  $\text{MnFe}_2\text{O}_4/\text{CNT}$  as a third-electrode, *Sep. Purif. Technol.*, 2022, **294**, 121171.

- 2 C. Shi, S. Yu and C. Li, Fabrication of aligned carbon nanofiber doped with SnO<sub>2</sub>-Sb for efficient electrochemical removal of tetracycline, *Chem. Eng. J.*, **441**, 136052.
- 3 W. Sun, Y. Sun and K. J. Shah, et al., Electrocatalytic oxidation of tetracycline by Bi-Sn-Sb/ $\gamma$ -Al<sub>2</sub>O<sub>3</sub> three-dimensional particle electrode, *J. Hazard. Mater.*, **370**, 24-32.
- 4 T. Chen, Q. Hao and W. Yang, et al., A honeycomb multilevel structure Bi<sub>2</sub>O<sub>3</sub> with highly efficient catalytic activity driven by bias voltage and oxygen defect, *Appl. Catal., B*, **237**, 442-448.
- 5 Zhuang Xie, Guoqing Xiao and Xiang Zeng, et al., Ion-exchange synthesis Ag@Bi<sub>2</sub>WO<sub>6</sub>/FeWO<sub>4</sub> nanosheet with white-LED-light-driven for efficient activation of peroxymonosulfate: Synthesis, characterization, and mechanism, *Sep. Purif. Technol.*, **315**, 123481.
